# Supplementary material for: Stable Clinical Course of Chronic Obstructive Pulmonary Disease Patients in the Era of Double Bronchodilator Therapy: A Single Referral Center Experience
Source: MDPI journal article supplement (doi:10.3390/jcm9082547), 2020-08-06
Supplement: s1 [file s1]

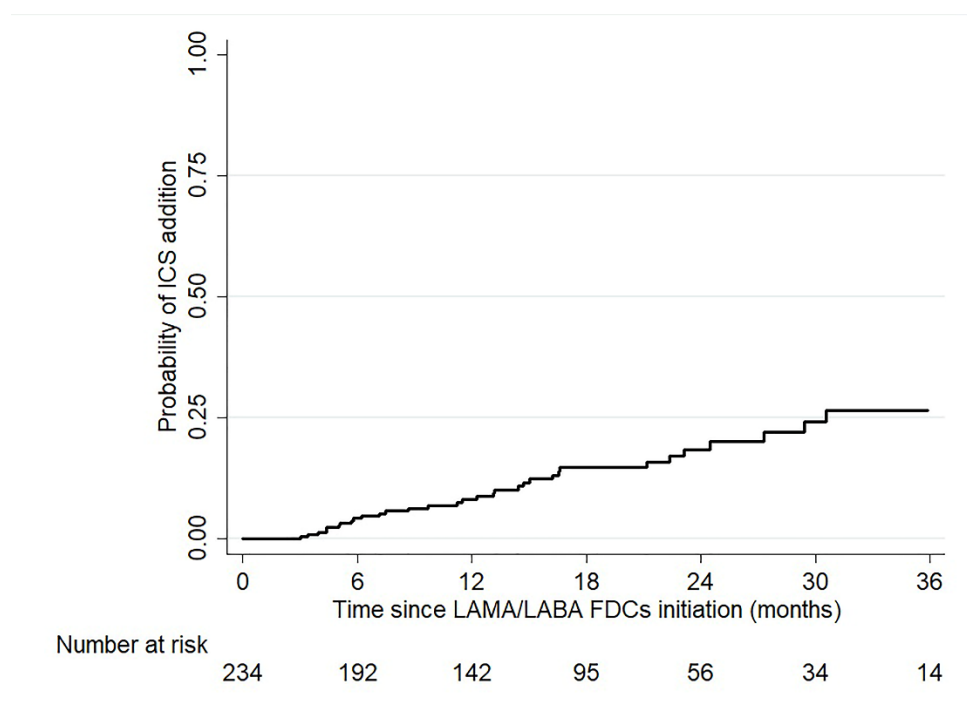

**Figure S1.** Kaplan-Meier curves for ICS addition in 234 patients who maintained LAMA/LABA fixed-dose combinations therapy for more than 90 days. FDC, fixed-dose combinations; ICS, inhaled corticosteroids; LABA, long-acting beta2-agonist; LAMA, long-acting muscarinic antagonist.

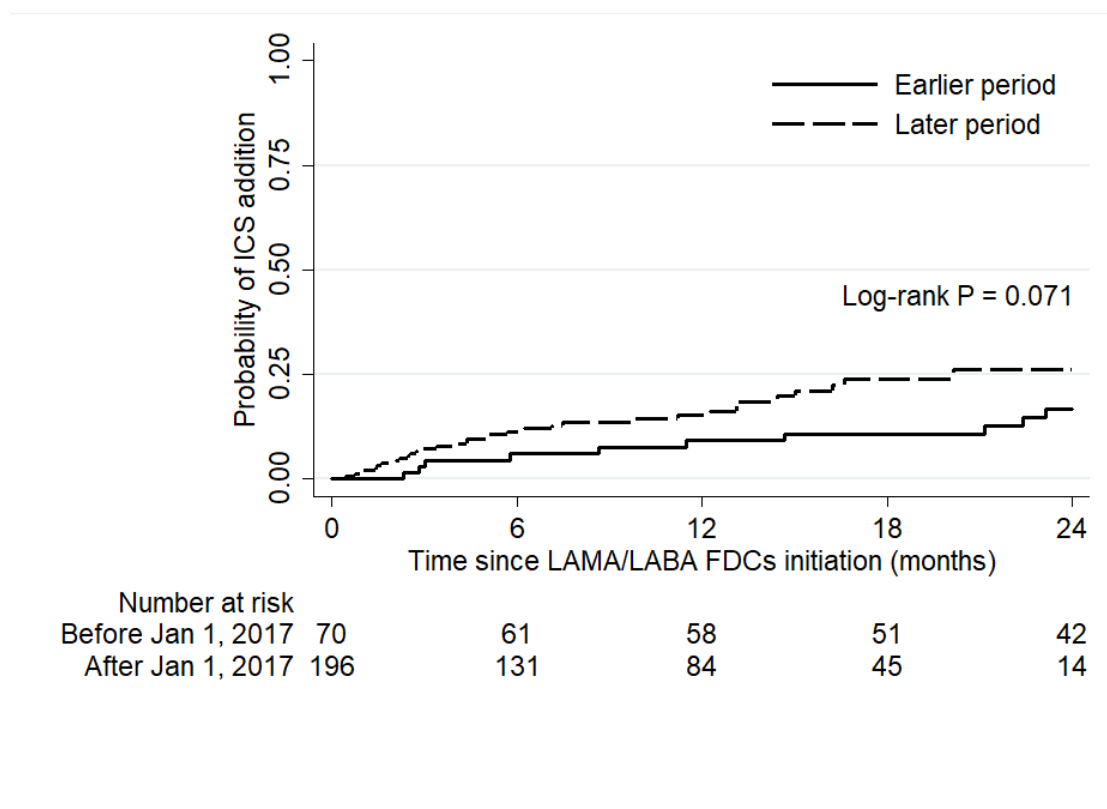

**Figure S2.** Kaplan-Meier curves for ICS addition in patients who started LAMA/LABA fixed-dose combinations therapy before and after January 1, 2017. FDC, fixed-dose combinations; ICS, inhaled corticosteroids; LABA, long-acting beta2-agonist; LAMA, long-acting muscarinic antagonist.

**Table S1.** Clinical factors associated with ICS addition after LAMA/LABA fixed-dose combinations therapy including only treatment naïve patients (N=108).

|                                    | Univariate analysis       |                  | Multivariate analysis   |                  |
|------------------------------------|---------------------------|------------------|-------------------------|------------------|
|                                    | Unadjusted HR<br>(95% CI) | p-value          | Adjusted HR<br>(95% CI) | p-value          |
| Age, years                         | 0.99 (0.93 – 1.06)        | 0.820            | 0.96 (0.90 – 1.03)      | 0.245            |
| Male sex                           | 2.59 (0.33 – 20.51)       | 0.369            | 4.32 (0.19 – 97.58)     | 0.358            |
| Smoking, ever                      | 1.38 (0.28 – 6.74)        | 0.689            | 0.34 (0.03 – 3.99)      | 0.391            |
| BMI < 21(kg/m <sup>2</sup> )       | 1.02 (0.29 – 3.61)        | 0.972            | 2.00 (0.44 – 9.19)      | 0.373            |
| mMRC ≥ 2                           | 1.72 (0.64 – 4.65)        | 0.285            | 2.23 (0.60 – 8.29)      | 0.230            |
| CAT ≥ 10                           | 1.37 (0.44 – 4.28)        | 0.587            |                         |                  |
| Exacerbation in the previous year* | 7.40 (2.67 – 20.50)       | <b>&lt;0.001</b> | 11.57 (3.24 – 41.38)    | <b>&lt;0.001</b> |
| GOLD grade ≥ 3 <sup>†</sup>        | 1.10 (0.31 – 3.87)        | 0.885            | 1.10 (0.20 – 5.92)      | 0.912            |
| DLco < 80% pred                    | 0.71 (0.24 – 2.13)        | 0.544            |                         |                  |
| Positive BDR                       | 2.39 (0.89 – 6.44)        | 0.085            | 3.14 (1.00 – 9.93)      | 0.051            |
| Blood eosinophil count ≥ 300 (/μL) | 0.83 (0.19 – 3.70)        | 0.804            | 2.05 (0.37 – 11.41)     | 0.412            |

\* Exacerbation of moderate (hospital visit) or severe (emergency department or hospitalization) degree. <sup>†</sup> GOLD ≥ grade 3 (FEV<sub>1</sub> < 50% predicted). BDR, bronchodilator response; BMI, body mass index; CAT, COPD assessment test; CI, confidence interval; DLco, diffusing capacity for carbon monoxide; FEV<sub>1</sub>, forced expiratory volume in 1s; GOLD, global initiative for chronic obstructive lung disease; HR, hazard ratios; ICS, inhaled corticosteroids; LABA, long-acting beta2-agonist; LAMA, long-acting muscarinic antagonist; mMRC, modified medical research council.

**Table S2.** Clinical factors associated with ICS addition after LAMA/LABA fixed-dose combinations therapy (N = 266).

|                                                | Univariate analysis       |                  | Multivariate analysis   |                  |
|------------------------------------------------|---------------------------|------------------|-------------------------|------------------|
|                                                | Unadjusted HR<br>(95% CI) | p-value          | Adjusted HR<br>(95% CI) | p-value          |
| Age, years                                     | 1.01 (0.98 – 1.05)        | 0.460            | 0.99 (0.95 – 1.03)      | 0.594            |
| Male sex                                       | 0.88 (0.32 – 2.46)        | 0.813            | 0.49 (0.09 – 2.64)      | 0.409            |
| Smoking, ever                                  | 1.10 (0.39 – 3.06)        | 0.857            | 1.58 (0.90 – 8.29)      | 0.591            |
| BMI < 21(kg/m <sup>2</sup> )                   | 0.97 (0.47–2.00)          | 0.927            | 0.70 (0.30 – 1.61)      | 0.399            |
| mMRC ≥ 2                                       | 2.31 (1.28 – 4.16)        | <b>0.005</b>     | 3.47 (1.77 – 6.78)      | <b>&lt;0.001</b> |
| CAT ≥ 10                                       | 1.69 (0.82 – 3.50)        | 0.157            |                         |                  |
| ICS withdrawal ahead of LAMA/LABA FDCs therapy | 2.70 (1.47 – 4.94)        | <b>0.001</b>     | 2.70 (1.32 – 5.53)      | <b>0.007</b>     |
| Exacerbation in the previous year*             | 3.39 (1.90 – 6.04)        | <b>&lt;0.001</b> | 3.71 (1.98 – 6.95)      | <b>&lt;0.001</b> |
| GOLD grade ≥ 3 <sup>†</sup>                    | 1.80 (0.93–3.47)          | 0.080            | 1.37 (0.66 – 2.84)      | 0.403            |
| DLco < 80% pred                                | 1.87 (0.83–4.21)          | 0.132            |                         |                  |
| Positive BDR                                   | 1.36 (0.69 – 2.67)        | 0.376            | 1.76 (0.86 – 3.62)      | 0.122            |
| Blood eosinophil count ≥ 300 (/μL)             | 0.91 (0.39 – 2.15)        | 0.833            | 1.12 (0.46 – 2.71)      | 0.800            |

\* Exacerbation of moderate (hospital visit) or severe (emergency department or hospitalization) degree. <sup>†</sup> GOLD ≥ grade 3 (FEV<sub>1</sub> < 50% predicted). BDR, bronchodilator response; BMI, body mass index; CAT, COPD assessment test; CI, confidence interval; DLco, diffusing capacity for carbon monoxide; FDC, fixed-dose combination; FEV<sub>1</sub>, forced expiratory volume in 1s; GOLD, global initiative for chronic obstructive lung disease; HR, hazard ratios; ICS, inhaled corticosteroids; LABA, long-acting beta2-agonist; LAMA, long-acting muscarinic antagonist; mMRC, modified medical research council.

**Table S3.** Changes in pulmonary function from baseline to the end of LAMA/LABA fixed-dose combinations therapy according to ICS addition afterwards (N = 261)\*.

|                                                        | ICS addition (-)<br>(N = 211)* | ICS addition (+)<br>(N = 47) | p-value |
|--------------------------------------------------------|--------------------------------|------------------------------|---------|
| <b>Prebronchodilator FEV<sub>1</sub> (mL/year)</b>     |                                |                              |         |
| Annual change                                          | 44.96 (22.52, 67.40)           | -21.96 (-88.46, 44.55)       |         |
| Average difference in annual change                    |                                |                              |         |
| Crude                                                  | <i>Reference</i>               | -66.92 (-137.10, 3.27)       | 0.062   |
| Model 1                                                | <i>Reference</i>               | -66.62 (-136.90, 3.65)       | 0.063   |
| Model 2                                                | <i>Reference</i>               | -66.41 (-138.31, 5.48)       | 0.070   |
| <b>Prebronchodilator FEV<sub>1</sub> (% pred/year)</b> |                                |                              |         |
| Annual change                                          | 2.57 (1.74, 3.41)              | 0.26 (-2.15, 2.67)           |         |
| Average difference in annual change                    |                                |                              |         |
| Crude                                                  | <i>Reference</i>               | -2.31 (-4.86, 0.23)          | 0.075   |
| Model 1                                                | <i>Reference</i>               | -2.29 (-4.81, 0.24)          | 0.077   |
| Model 2                                                | <i>Reference</i>               | -2.29 (-4.89, 0.30)          | 0.084   |

Values are mean (95% CI). \* Five patients in non-ICS addition group had missing data. Model 1: Adjusted for age, sex, smoking history (never vs. ever), BMI (< 21 vs. ≥ 21 kg/m<sup>2</sup>); Model 2: Further adjusted dyspnea (mMRC ≥ 2 vs. < 2), COPD severity (global initiative for chronic obstructive lung disease [GOLD] grade 1,2 vs. 3,4), previous ICS use, exacerbation in the previous year; BMI, body mass index; CI, confidence interval; GOLD, global initiative for chronic obstructive lung disease; ICS, inhaled corticosteroids; LABA, long-acting beta2-agonist; LAMA, long-acting muscarinic antagonist; mMRC, modified medical research council.
